# Supplementary material for: Promoting the neural differentiation of embryonic stem cells by using thermosensitive nanocomposites
Source: Royal Society of Chemistry journal article supplement (doi:10.1039/d1ma00184a), 2021-01-01
Supplement: d1ma00184a1.pdf [file d1ma00184a1.pdf]

Supporting information for

Promoting neural differentiation of embryonic stem cells  
by using thermosensitive nanocomposite

Shaoyu Cheng, Fei Yu, Benben Lu, Hongwei Wang\*, Lin Yuan\*

*State and Local Joint Engineering Laboratory for Novel Functional Polymeric  
Materials, College of Chemistry, Chemical Engineering and Materials Science,  
Soochow University, Suzhou 215123, P. R. China.*

**\* Corresponding Authors**

E-mail: Hongwei Wang (wanghw@suda.edu.cn); Lin Yuan (yuanl@suda.edu.cn).

# 1. Result and Discussion

## 1.1. Synthesis of polymer

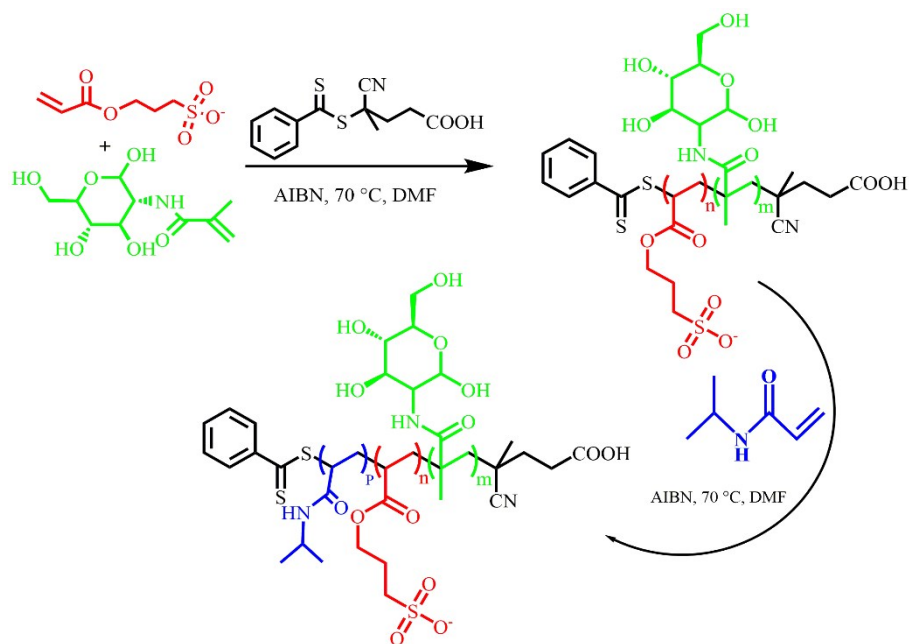

**Fig. S1** Synthesis of p(MAG-co-SPA) and pNIPAAm-b-p(MAG-co-SPA) via reversible addition-fragmentation chain transfer (RAFT) polymerization

## 1.2. $^1\text{H}$ NMR spectrum of monomer and polymer

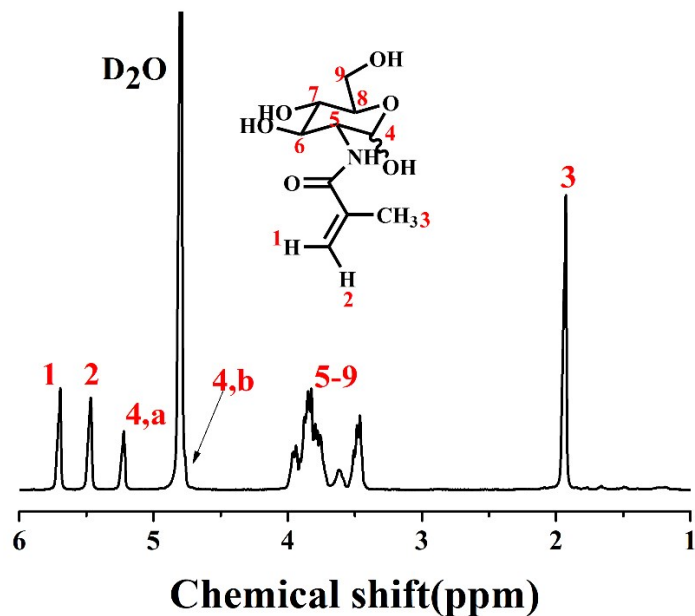

**Fig. S2**  $^1\text{H}$  NMR spectrum of MAG.  $^1\text{H}$  NMR (400 MHz,  $\text{D}_2\text{O}$ ) 5.71 (s, 1H), 5.48 (s, 1H), 5.24 (s, 1H), 4.04–3.39 (m, 6H), 1.95 (s, 3H).

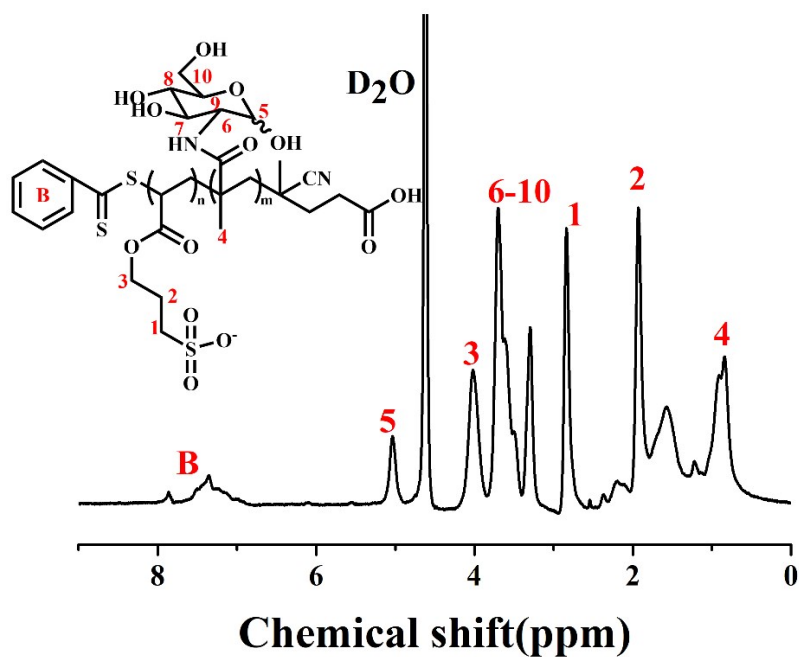

**Fig. S3**  $^1\text{H}$  NMR spectrum of p(MAG-co-SPA).  $^1\text{H}$  NMR (400 MHz,  $\text{D}_2\text{O}$ ) 5.21 (s, 1H), 4.19 (s, 2H), 3.68 (d,  $J = 159.8$  Hz, 6H), 2.88 (s, 2H), 1.98 (s, 2H), 0.96 (d,  $J = 30.0$  Hz, 3H).

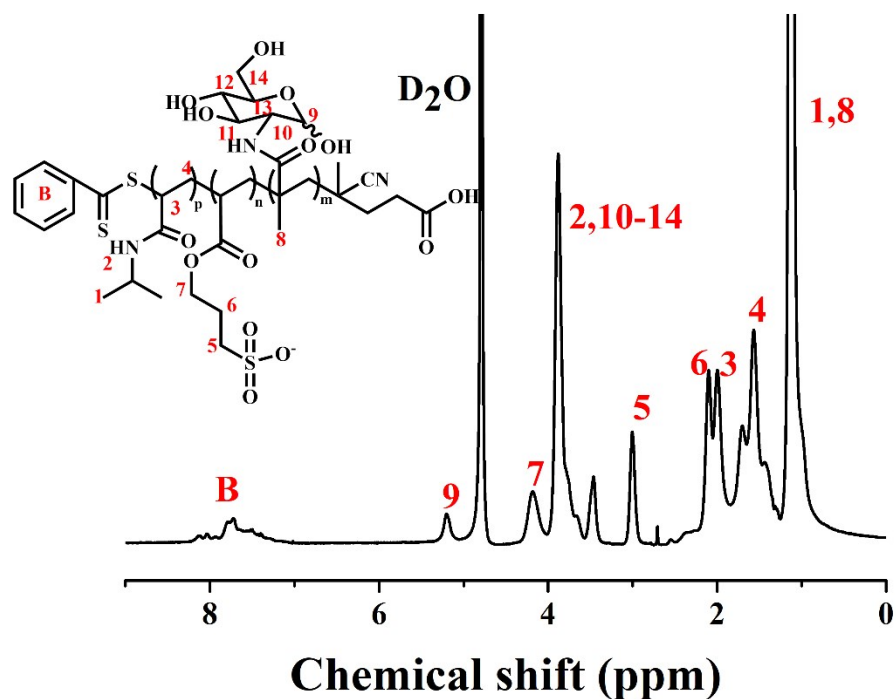

**Fig. S4** <sup>1</sup>H NMR spectrum of pNIPAAm-b-p(MAG-co-SPA). <sup>1</sup>H NMR (400 MHz, D<sub>2</sub>O) 5.21 (s, 1H), 4.19 (s, 2H), 3.68 (d, J = 159.8 Hz, 7H), 3.02 (s, 2H), 2.11 (s, 2H), 1.98 (s, 1H), 1.52 (s, 2H), 1.06 (d, J = 30.0 Hz, 6H).

### 1.3. The feed ratio and molecular weight of the polymer

**Table S1** Details in synthesizing copolymers by RAFT polymerization

| Copolymer | Monomer  | CTA   | I    | [M]:[CTA]:[I] |
|-----------|----------|-------|------|---------------|
| pMS       | MAG, SPA | CPADB | AIBN | 75:2:1        |
| pN1MS     | NIPAAm   | pMS   | AIBN | 100:2:1       |
| pN2MS     | NIPAAm   | pMS   | AIBN | 200:2:1       |
| pN3MS     | NIPAAm   | pMS   | AIBN | 400:2:1       |
| pN4MS     | NIPAAm   | pMS   | AIBN | 600:2:1       |
| pN1       | NIPAAm   | CPADB | AIBN | 97:2:1        |
| pN2       | NIPAAm   | CPADB | AIBN | 150:2:1       |
| pN3       | NIPAAm   | CPADB | AIBN | 256:2:1       |
| pN4       | NIPAAm   | CPADB | AIBN | 362:2:1       |

**Table S2** GPC results of synthetic copolymers by RAFT polymerization

| polymer | $M_w$ (Da) | PDI  | Ratio of monomer<br>[NIPAAm]:[MAG]:[SPA<br>] |
|---------|------------|------|----------------------------------------------|
| pMS     | 8900       | 1.17 | 0:1:1.05                                     |
| pN1MS   | 13700      | 1.20 | 2.2:1:1.05                                   |
| pN2MS   | 18500      | 1.22 | 4.6:1:1.05                                   |
| pN3MS   | 28100      | 1.25 | 9.1:1:1.05                                   |
| pN4MS   | 37700      | 1.28 | 14.2:1:1.05                                  |
| pN1     | 4800       | 1.12 | 1:0:0                                        |
| pN2     | 9500       | 1.18 | 1:0:0                                        |
| pN3     | 19000      | 1.23 | 1:0:0                                        |
| pN4     | 28000      | 1.24 | 1:0:0                                        |

#### 1.4. Primers

**Table S3** The primers used in qPCR.

| Gene                               | Forward primer            | Reverse primer                | Product size (bp) |
|------------------------------------|---------------------------|-------------------------------|-------------------|
| <i><math>\beta</math>-Actin</i>    | CCCTAGGCACCAGGG<br>TGTGA  | TCCCAGTTGGTAACAATG<br>CCA     | 128               |
| <i>Oct-4</i>                       | GGCGTTCTCTTTGGAA<br>AGGT  | GGCGTTCTCTTTGGAAAG<br>GT      | 112               |
| <i>Sox17</i>                       | GATGCGGGATACGCC<br>AGTG   | CCACCACCTCGCCTTTCA<br>C       | 136               |
| <i>Flk1</i>                        | CACCTGGCACTCTCC<br>ACCTTC | GATTTTCATCCCCTACTACCG<br>AAAG | 239               |
| <i>Nestin</i>                      | CCCTGAAGTCGAGGA<br>GCTG   | CTGCTGCACCTCTAAGCG<br>A       | 166               |
| <i><math>\beta</math>3-Tubulin</i> | ACTTTATCTTCGGTCA<br>GAGTG | CTCACGACATCCAGGAC<br>TGA      | 96                |

## 1.5. TEM characterization of nanocomposites

Compared with AuNPs, the TEM images of AuNPs-pNMS can clearly show the polymer grafted on the outside of the particles (Fig. S5-7). In Fig. S6, the samples were prepared at 25 °C and the particle sizes of A to D are 23 nm, 31 nm, 40 nm and 50 nm respectively. In Fig. S7, the samples were prepared at 37 °C and the particle sizes of A to D are 20 nm, 27 nm, 33 nm and 40 nm respectively. It can be clearly seen that as the temperature increases, the particle size of AuNPs-pNMS decreases. However, the size was smaller than that measured by DLS. This was mainly due to the process involved in the preparation of sample. In the case of the TEM methods, TEM images depicted the actual size at the dried state of sample, whereas the size measured by the laser light scattering method was a hydrodynamic diameter (hydrated state), and therefore the nanocomposite showed a larger hydrodynamic volume due to solvent effect in the hydrated state.<sup>1</sup>

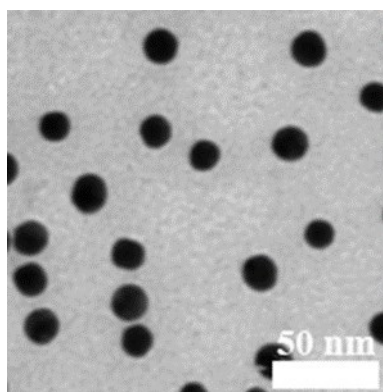

**Fig. S5.** TEM image of AuNPs

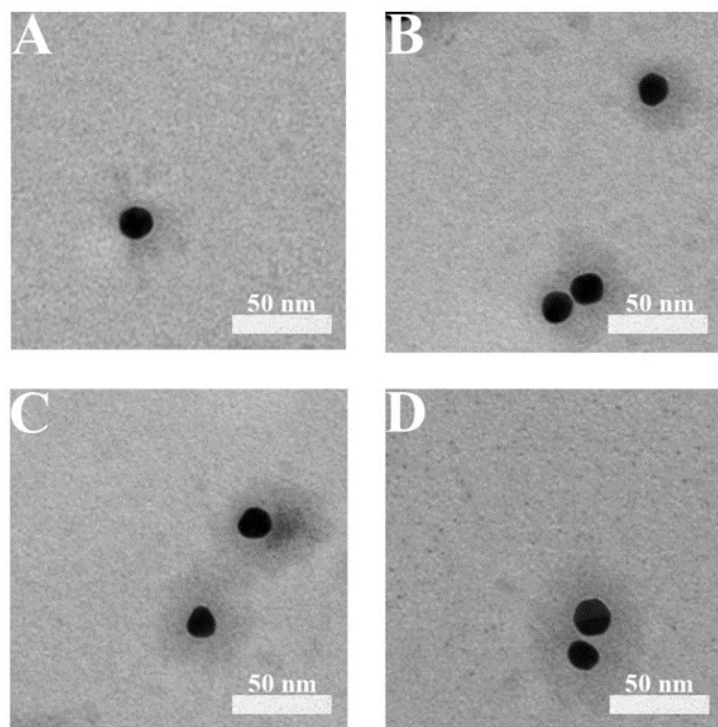

**Fig. S6.** TEM images of AuNPs-pNMS at 25 °C. (A): AuNPs-pN1MS, (B): AuNPs-pN2MS, (C): AuNPs-pN3MS, (D): AuNPs-pN4MS.

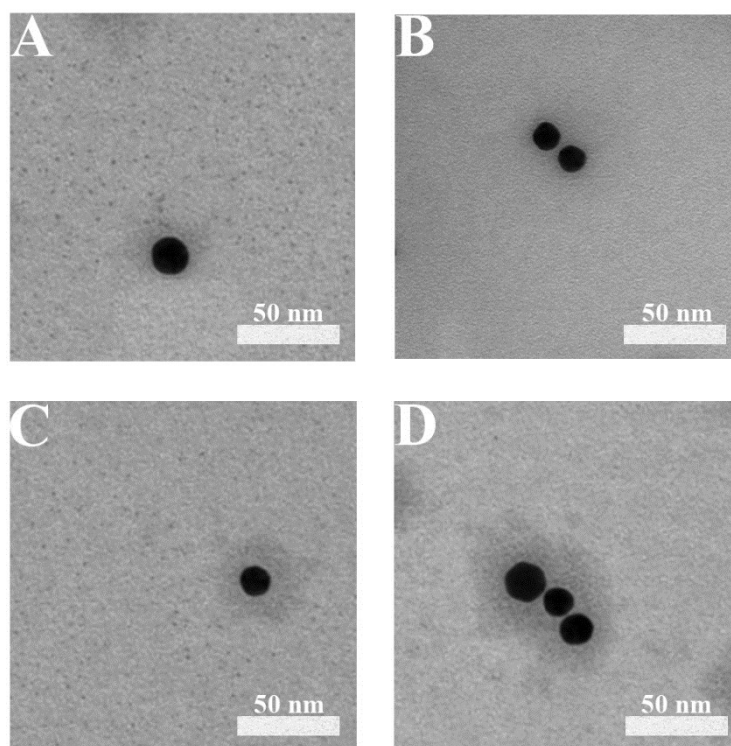

**Fig. S7.** TEM images of AuNPs-pNMS at 37 °C. (A): AuNPs-pN1MS, (B): AuNPs-pN2MS, (C): AuNPs-pN3MS, (D): AuNPs-pN4MS.

## **1.6. Immunofluorescence staining**

Immunofluorescence staining was performed to detect the protein expression levels of Sox17 and Flk1. In Fig. S8, all sample groups showed the expression of Sox17 protein. However, compared with the negative control group and the heparin group, the expression level of Sox17 protein in the cells treated with the nanocomposite was significantly reduced, especially AuNPs-PNMs, which greatly inhibited the expression of Sox17 protein. This is consistent with the detection results of the relative expression level of SOX17 gene. In Fig. S9, all sample groups also showed the expression of Flk1 protein. And the expression level of Flk1 protein is consistent with the detection results of the relative expression level of Flk1 gene. The nanocomposite greatly inhibits the expression of Flk1 protein, especially AuNPs-pNMS, which has the best effect.



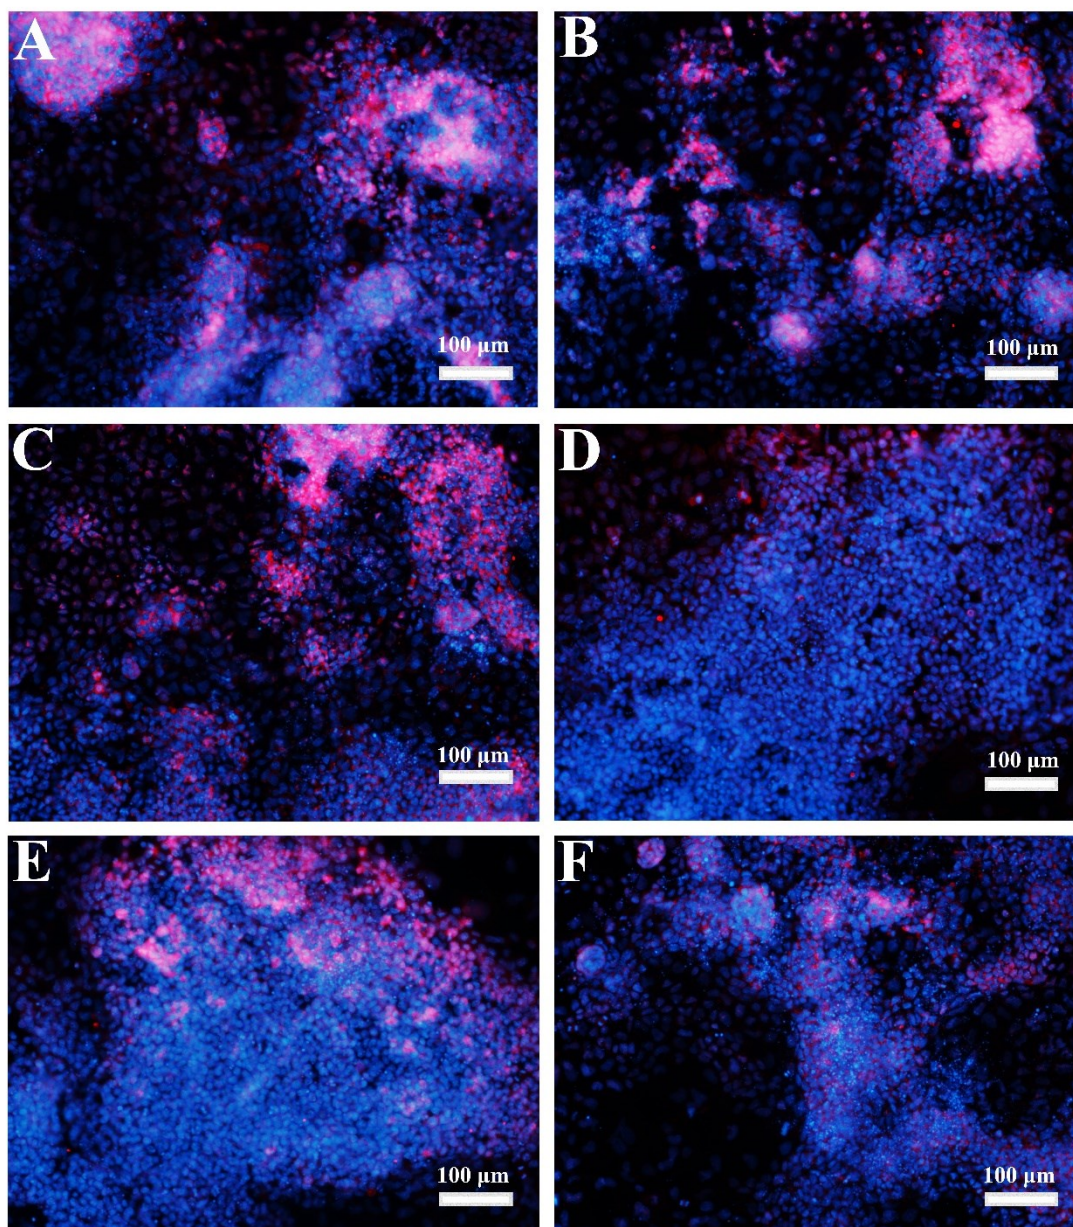

**Fig. S8.** Immunofluorescence images of ESCs, (A): Blank, (B): Heparin, (C): AuNPs, (D): AuNPs-pMS, (E): AuNPs-pN, (F): AuNPs-pNMS. Scale bar: 100  $\mu\text{m}$ . Sox17 was detected with anti-Sox17 mouse monoclonal antibody and Alexa Fluor 555-conjugated goat anti-mouse IgG (red), and cell nuclei were stained with DAPI (blue).



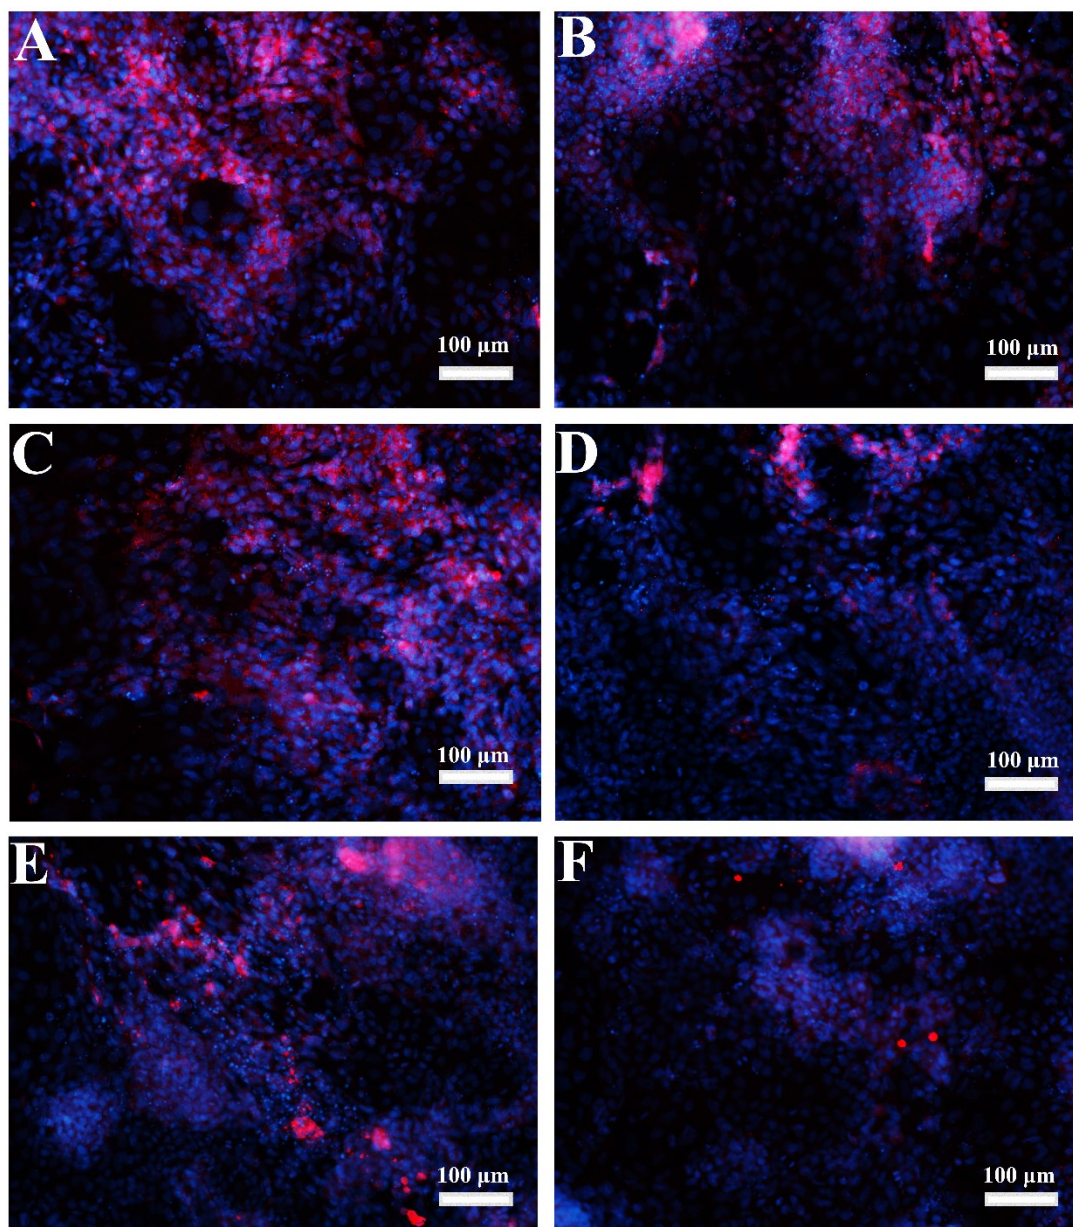

**Fig. S9.** Immunofluorescence images of ESCs, (A): Blank, (B): Heparin, (C): AuNPs, (D): AuNPs-pMS, (E): AuNPs-pN, (F): AuNPs-pNMS. Scale bar: 100  $\mu\text{m}$ . Flk1 was detected with VEGFR2 polyclonal antibody (rabbit polyclonal) and goat anti-rabbit IgG (H+L), CoraLite594 conjugate (red), and cell nuclei were stained with DAPI (blue).

### 1.7. Adhesion experiment of nanocomplex to cell

First, the fluorescent labeled thermosensitive heparin mimic (pNMSF) was synthesized

via the reversible addition fragmentation chain-transfer (RAFT) polymerization of NIPAAm, pMS, and FluMA. Briefly, NIPAAm (0.9053 g, 8 mmol), MAG (0.360 g, 0.04 mmol), FluMA (0.032 g, 0.08 mmol), and AIBN (0.0033 g, 0.02 mmol) were dissolved in the solution of DMF and DIW (1:1, v/v). The solution was then degassed by bubbling with nitrogen for 30 min. The polymerization was carried out at 70 °C for 24 h under a nitrogen atmosphere in a glovebox. When the polymerization was complete, the polymerization mixture was dialyzed for 48 h against DIW to remove the excess monomers. The copolymer formed in solution were lyophilized to give a fluffy yellow solid. Then the copolymer was subjected to a sulfhydryl reaction and further fluorescently labeled nanocomposite was prepared. Fluorescence images were taken after the fluorescent labeled nanocomposite acts on the cells for 4 hours. In Fig. S10, the images were taken by a fluorescence microscope. It can be clearly seen that the fluorescent labeled nanocomposites overlap with the cell completely. The adhesion of the fluorescent labeled nanocomposites to a single cell was further observed by confocal microscope. It can be clearly observed that the skeleton of a single cell was perfectly covered with the fluorescent labeled nanocomposites in Fig. S11. Chithrani et. al. determined that after being taken up by cells, AuNPs are wrapped in vesicles and will not be evenly dispersed inside the cells.<sup>2</sup> If there is no nanocomposite attached to the cell membrane surface, the fluorescence image of the nanocomposites will not completely overlap with the cytoskeleton. Therefore, we can determine that the nanocomposite still adheres to the surface of the cell membrane after the material acts on the cell for 4 hours.

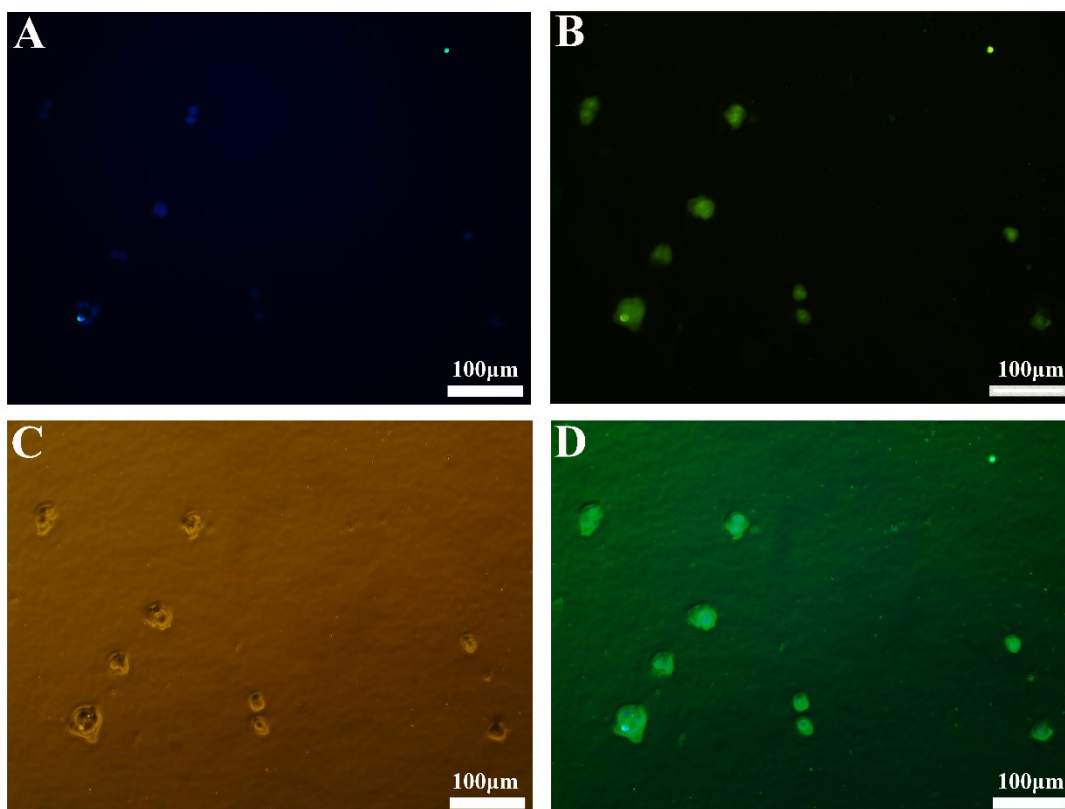

**Fig. S10.** The adhesion of the nanocomposite after acting on the cells for 4 hours. (A): cell nuclei were stained with DAPI (blue), (B): the fluorescent labeled nanocomposite. (C): ESCs under bright field, (D): Merged image from A-C. Scale bar: 100 µm. The images were taken by a fluorescence microscope.

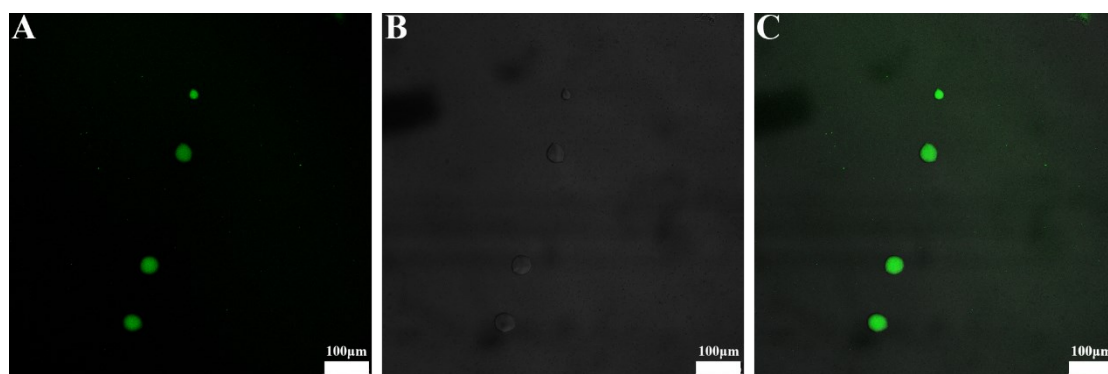

**Fig. S11.** The adhesion of the nanocomposite after acting on the cells for 4 hours. (A): the fluorescent labeled nanocomposite. (B): ESCs under bright field, (D): Merged image from A and B. Scale bar: 100 µm. The images was taken by a confocal microscope.

## **1.8. Cell culture with/without serum**

We have done the experiments to confirm the neural differentiation effect of nanocomposite on ESCs in the culture medium with/without serum. However, we found that ESCs could not proliferate in the culture medium without serum and would gradually die in the experiment (Fig. S12). On the 3rd day, ESCs in the culture medium with serum proliferated in a large amount, but ESCs in the culture medium without serum did not proliferate and the growth state of ESCs was not very good. On the 5th day, the proliferation of ESCs in the culture medium with serum was very good, however, ESCs in the culture medium without serum had almost all died. Because maintaining the normal proliferation and good growth status of ESCs is the prerequisite for studying the differentiation of ESCs, the experiment to explore the differentiation of ESCs in the culture medium without serum cannot be carried out.



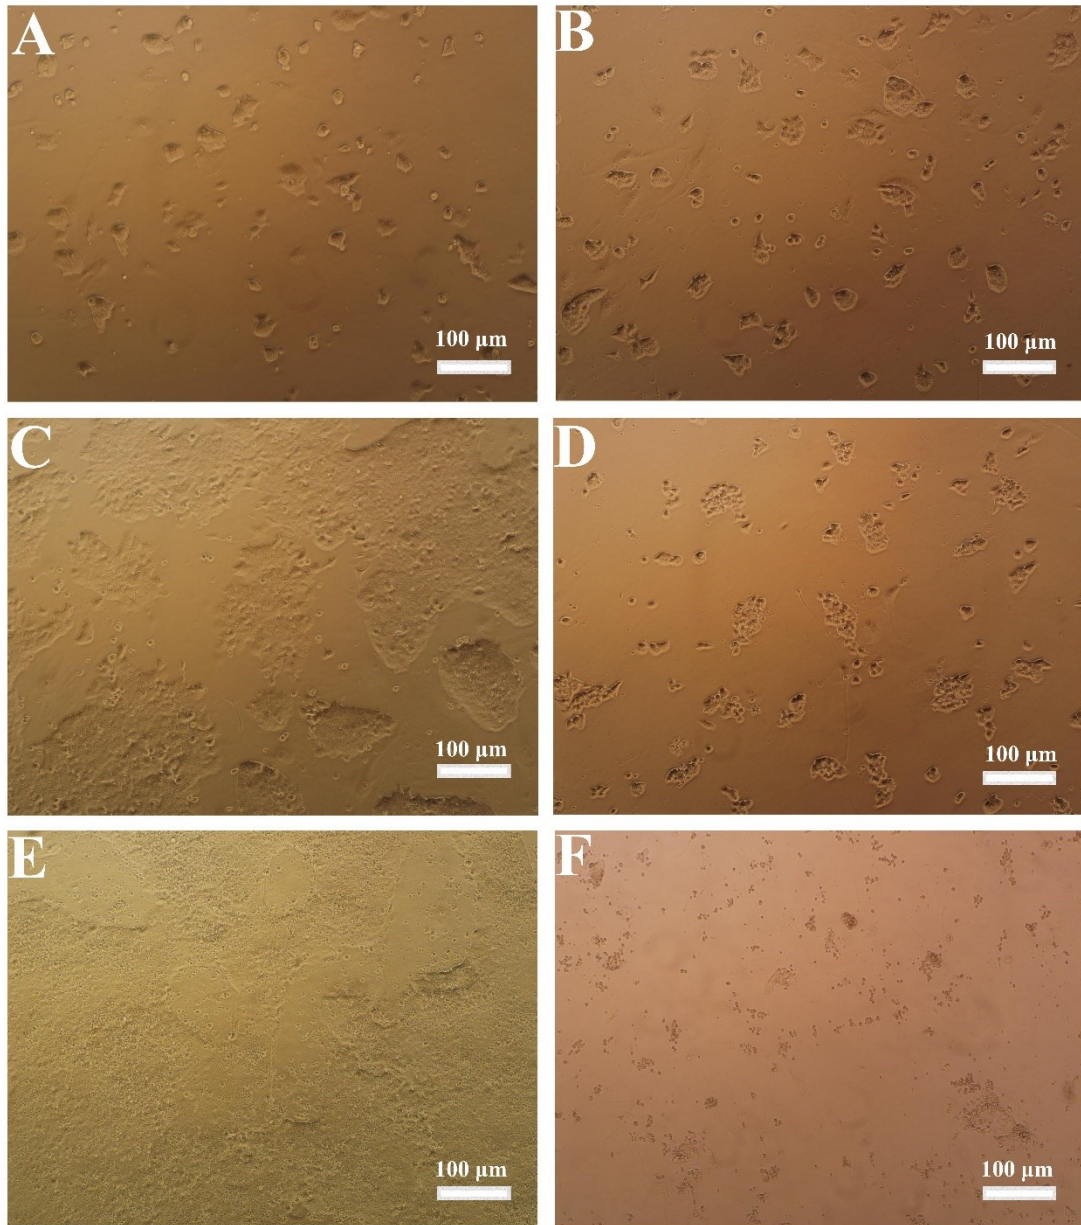

**Fig. S12.** The proliferation of ESCs. A, C, and E are images of ESCs grown in the culture medium with serum for 1, 3, and 5 days. B, D, and F are images of ESCs grown in the culture medium without serum for 1, 3, and 5 days. Scale bar: 100  $\mu\text{m}$ .

## 2. Reference

1. W. She, K. Luo, C. Zhang, G. Wang, Y. Geng, L. Li, B. He and Z. Gu, *Biomaterials*, 2013, **34**, 1613-1623.
2. B. D. Chithrani, A. A. Ghazani and W. C. W. Chan, *Nano Lett.*, 2006, **6**, 662-668.
